# Supplementary material for: Predictors, Type, and Impact of Bleeding on the Net Clinical Benefit of Long‐Term Ticagrelor in Stable Patients With Prior Myocardial Infarction
Source: PubMed Central journal article supplement — J Am Heart Assoc. 2021 Feb 9;10(4):e017008. doi: 10.1161/JAHA.120.017008 (PMC7955333; doi:10.1161/jaha.120.017008), 2021-02-09

# **Supplemental Material**

**Table S1. Baseline characteristics in the overall population stratified by high and low bleeding risk.**

| <b>Characteristic</b>        | <b>High Bleeding Risk<br/>N=4,054<br/>N (%)</b> | <b>Low Bleeding Risk<br/>N=16,888<br/>N (%)</b> | <b>p-value</b> |
|------------------------------|-------------------------------------------------|-------------------------------------------------|----------------|
| Age $\geq$ 75                | 986 (24.3)                                      | 2051 (12.1)                                     | <0.001         |
| Female                       | 813 (20.1)                                      | 4190 (24.8)                                     | <0.001         |
| BMI, median (IQR)            | 27.1<br>(24.2 – 30.4)                           | 28.1<br>(25.4 – 31.2)                           | <0.001         |
| Current Smoking              | 485 (12.0)                                      | 3019 (17.9)                                     | <0.001         |
| COPD                         | 318 (7.9)                                       | 1150 (6.8)                                      | 0.0203         |
| History of Hypertension      | 3218 (79.4)                                     | 13020 (77.1)                                    | 0.0018         |
| Hypercholesterolemia         | 3061 (75.5)                                     | 13019 (77.1)                                    | 0.0309         |
| eGFR < 60 ml/min             | 1422 (35.3)                                     | 3366 (20.2)                                     | <0.001         |
| Diabetes Mellitus            | 1616 (39.9)                                     | 5119 (30.3)                                     | <0.001         |
| Peripheral Artery Disease    | 295 (7.3)                                       | 835 (4.9)                                       | <0.001         |
| Multivessel Coronary Disease | 2333 (57.6)                                     | 10090 (59.8)                                    | 0.0109         |
| History of PCI               | 3295 (81.3)                                     | 14084 (83.4)                                    | 0.0012         |
| History of CABG              | 239 (5.9)                                       | 723 (4.3)                                       | <0.001         |

**Table S2. Primary endpoint and TIMI major bleeding rates stratified by high versus low bleeding and ischemic risk.**

|                               |                   | <b>High Bleeding Risk<br/>events (KM%)</b> | <b>Low Bleeding Risk<br/>events (KM%)</b> |
|-------------------------------|-------------------|--------------------------------------------|-------------------------------------------|
| <b>High Ischemic<br/>Risk</b> | <b><i>PEP</i></b> | N= 3511<br>353 (11.36%)                    | N= 14106<br>1055 (8.29%)                  |
|                               | <b><i>TMB</i></b> | N= 3511<br>127 (5.25%)                     | N= 14106<br>266 (2.61%)                   |
| <b>Low Ischemic<br/>Risk</b>  | <b><i>PEP</i></b> | N= 542<br>22 (4.39%)                       | N=2778<br>113 (4.58%)                     |
|                               | <b><i>TMB</i></b> | N= 542<br>10 (2.57%)                       | N=2778<br>29 (1.40%)                      |

*\*High ischemic risk defined as age  $\geq$  75, hypertension and current smoking, low ischemic risk is defined as the age  $<$  75, no hypertension and no current smoking.*

(NOTE: A total of 20937 subjects out of safety population were included in this analysis. There were five subjects with missing Ischemic risk status.)

(NOTE: 3 year KM estimates are reported)

(NOTE: PEP = CVD/MI/Stroke. TMB = TIMI Major or minor bleeding)

**Table S3: Other outcomes of ticagrelor 60 mg vs. placebo stratified by high or low bleeding risk at baseline.**

| Endpoint                                                                     | Ticagrelor 60 mg<br>n (KM %) | Placebo<br>n (KM %) | HR 95% CI          | P for interaction |
|------------------------------------------------------------------------------|------------------------------|---------------------|--------------------|-------------------|
| <b>Myocardial infarction</b>                                                 |                              |                     |                    |                   |
| Lower bleeding risk                                                          | 227 (4.39)                   | 264 (5.09)          | 0.85 (0.72-1.02)   | 0.71              |
| Higher bleeding risk                                                         | 58 (5.14)                    | 74 (5.94)           | 0.80 (0.56-1.12)   |                   |
| <b>Stroke</b>                                                                |                              |                     |                    |                   |
| Lower bleeding risk                                                          | 67 (1.38)                    | 100 (1.96)          | 0.66 (0.49-0.91)   | 0.12              |
| Higher bleeding risk                                                         | 24 (1.85)                    | 22 (1.85)           | 1.12 (0.63-1.99)   |                   |
| <b>Coronary heart disease death</b>                                          |                              |                     |                    |                   |
| Lower bleeding risk                                                          | 61 (1.25)                    | 97 (1.90)           | 0.63 (0.45-0.86)   | 0.008             |
| Higher bleeding risk                                                         | 45 (3.70)                    | 35 (2.85)           | 1.30 (0.84-2.03)   |                   |
| <b>Non-CV Death</b>                                                          |                              |                     |                    |                   |
| Lower bleeding risk                                                          | 74 (1.44)                    | 73 (1.44)           | 1.01 (0.73-1.39)   | 0.88              |
| Higher bleeding risk                                                         | 39 (3.82)                    | 38 (3.09)           | 1.06 (0.68-1.66)   |                   |
| <b>ICH or fatal bleeding</b>                                                 |                              |                     |                    |                   |
| Lower bleeding risk                                                          | 22 (0.60)                    | 22 (0.54)           | 1.09 (0.60-1.97)   | 0.56              |
| Higher bleeding risk                                                         | 11 (1.25)                    | 8 (0.91)            | 1.51 (0.61-3.75)   |                   |
| <b>Myocardial infarction, Stroke, death, or TIMI major bleeding</b>          |                              |                     |                    |                   |
| Lower bleeding risk                                                          | 477 (11.36)                  | 531 (11.51)         | 0.97 (0.86 – 1.10) | 0.18              |
| Higher bleeding risk                                                         | 181 (18.67)                  | 170 (15.50)         | 1.15 (0.93 – 1.42) |                   |
| <b>Myocardial infarction, Stroke, death, or TIMI major or minor bleeding</b> |                              |                     |                    |                   |
| Lower bleeding risk                                                          | 513 (9.99)                   | 546 (10.51)         | 0.94 (0.83 – 1.06) | 0.0697            |
| Higher bleeding risk                                                         | 201 (17.02)                  | 177 (14.15)         | 1.16 (0.95 – 1.43) |                   |

HR=Hazard Ratio, CI=Confidence Interval, CV= Cardiovascular, ICH= Intracranial Hemorrhage, KM= Kaplan Meier

**Table S4. PRECISE-DAPT score versus PEGASUS low or high bleeding risk, based on anemia and history of spontaneous bleeding.**

| PRECISE-DAPT Score   | PEGASUS TIMI 54 Low bleeding risk* |                            | PEGASUS TIMI 54 High bleeding risk* |                            |
|----------------------|------------------------------------|----------------------------|-------------------------------------|----------------------------|
|                      | N (%)                              | ARI**<br>3 yrs KM rate (%) | N (%)                               | ARI**<br>3 yrs KM rate (%) |
| <b>Very low risk</b> | 16,337 (81.2)                      | 1.8                        | 3,775 (18.5)                        | 3.6                        |
| <b>Low risk</b>      | 6 (3.2)                            | 0                          | 182 (96.8)                          | 7.8                        |
| <b>Moderate risk</b> | 1 (0)                              | 0                          | 50 (98)                             | 21.7                       |
| <b>High risk</b>     | 0 (0)                              | 0                          | 14 (100)                            | 24                         |

\* Based on anemia and history of spontaneous bleeding only

\*\* Absolute risk increase of TIMI major or minor bleeding, ticagrelor pooled vs. placebo

N = number, ARI = absolute risk increase, KM = Kaplan Maier

Figure S1. Etiology and Sites of TIMI major or minor bleeding in the Ticagrelor 60 mg group (Safety cohort).

**A. Etiology**

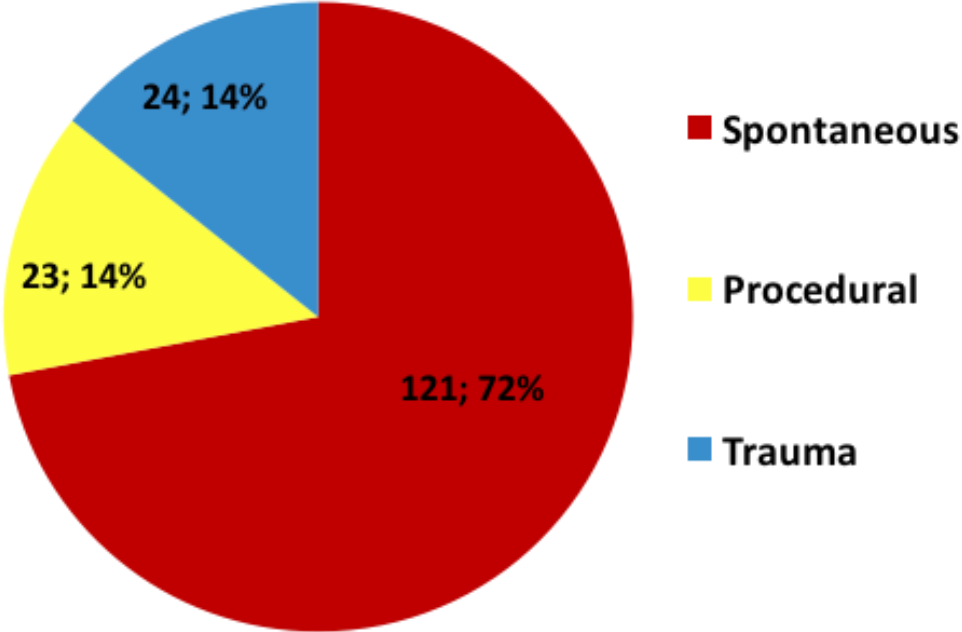

**B. Site**

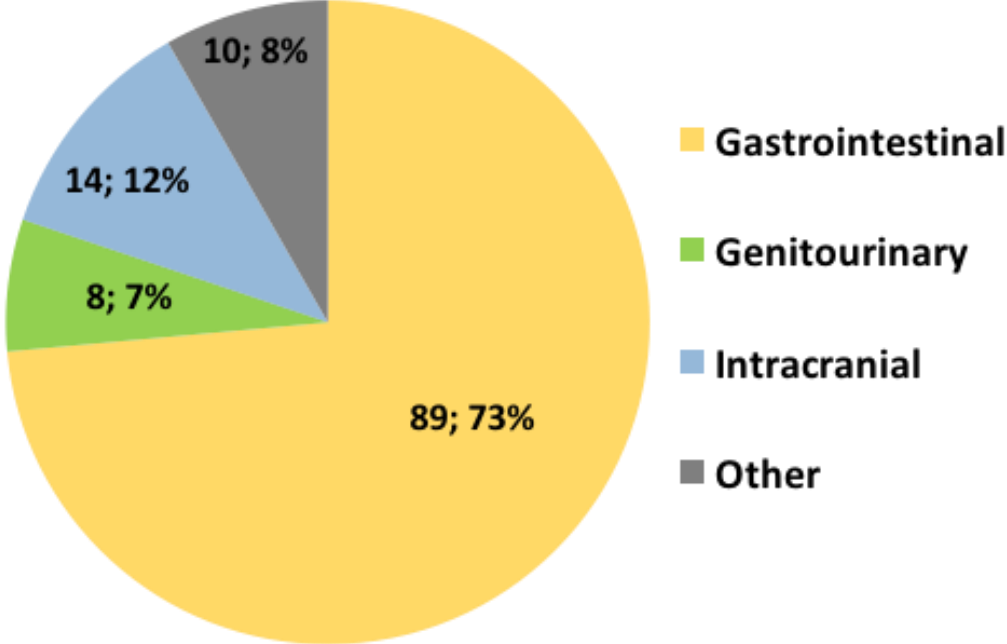

**Figure S2. Sites of spontaneous gastrointestinal TIMI major or minor Bleeding (doses pooled).**

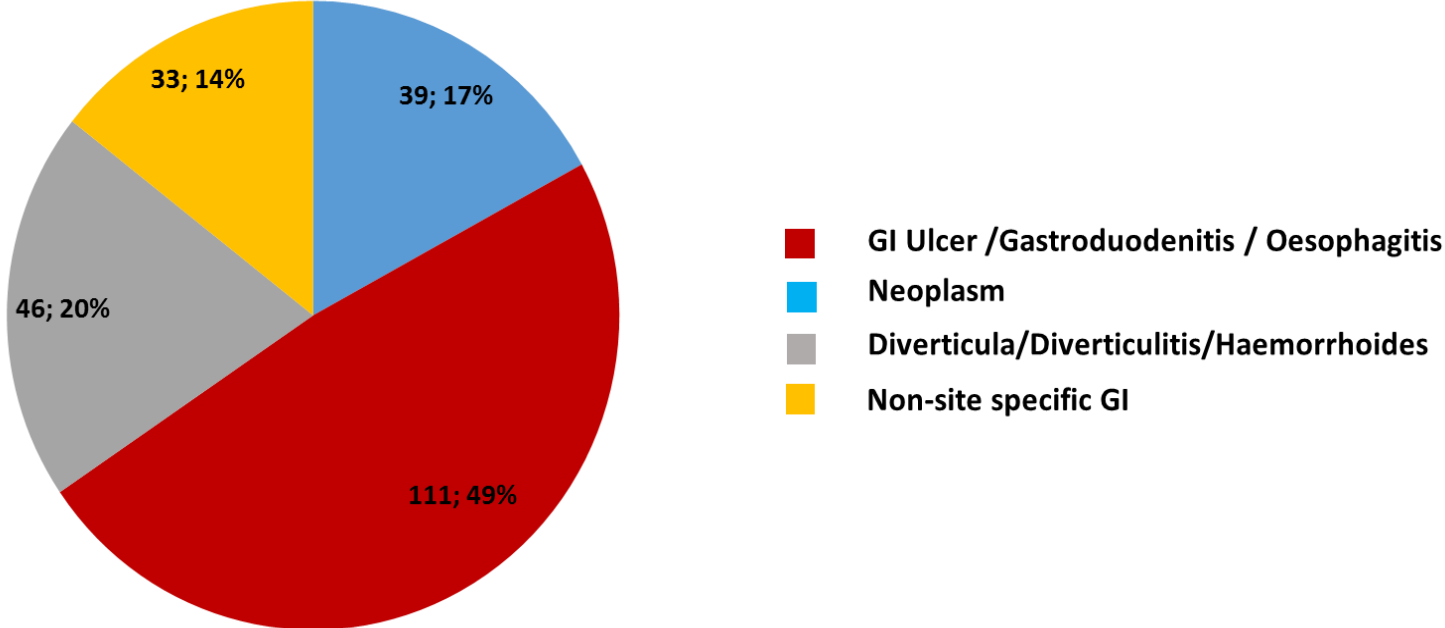

GI= Gastrointestinal.

**Figure S3. Spline of hemoglobin and TIMI major or minor bleeding in women (a) and men (b), dashed lines at the cutpoint defined for anemia.**

A.

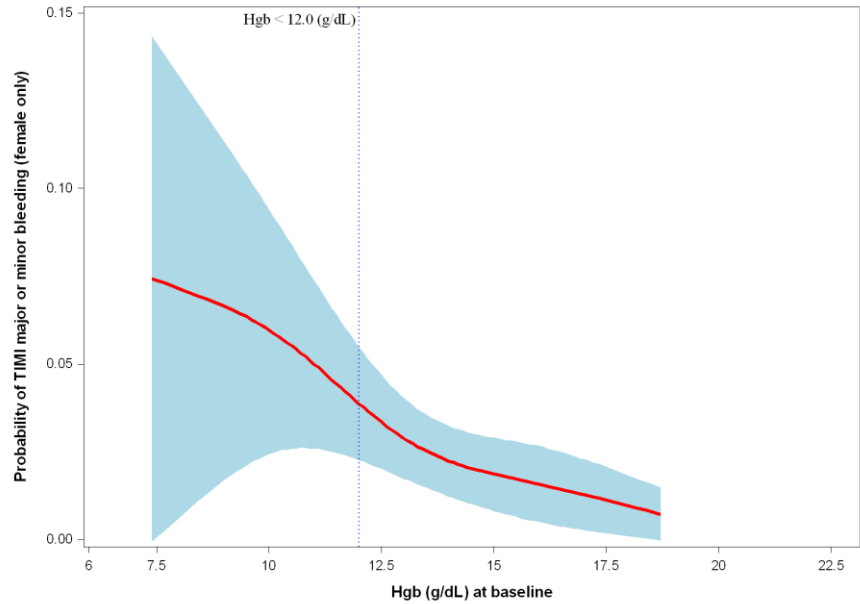

B.

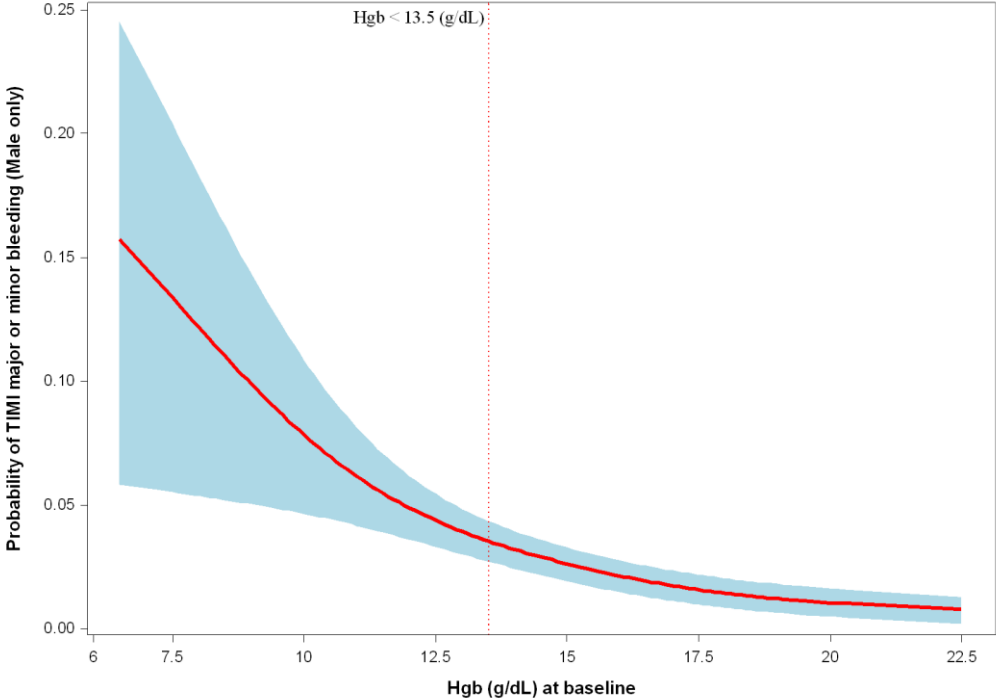



Figure S4. Instantaneous hazard for TIMI major or minor bleeding. HR=Hazard Ratio, TIMI=Thrombolysis in Myocardial Infarction.

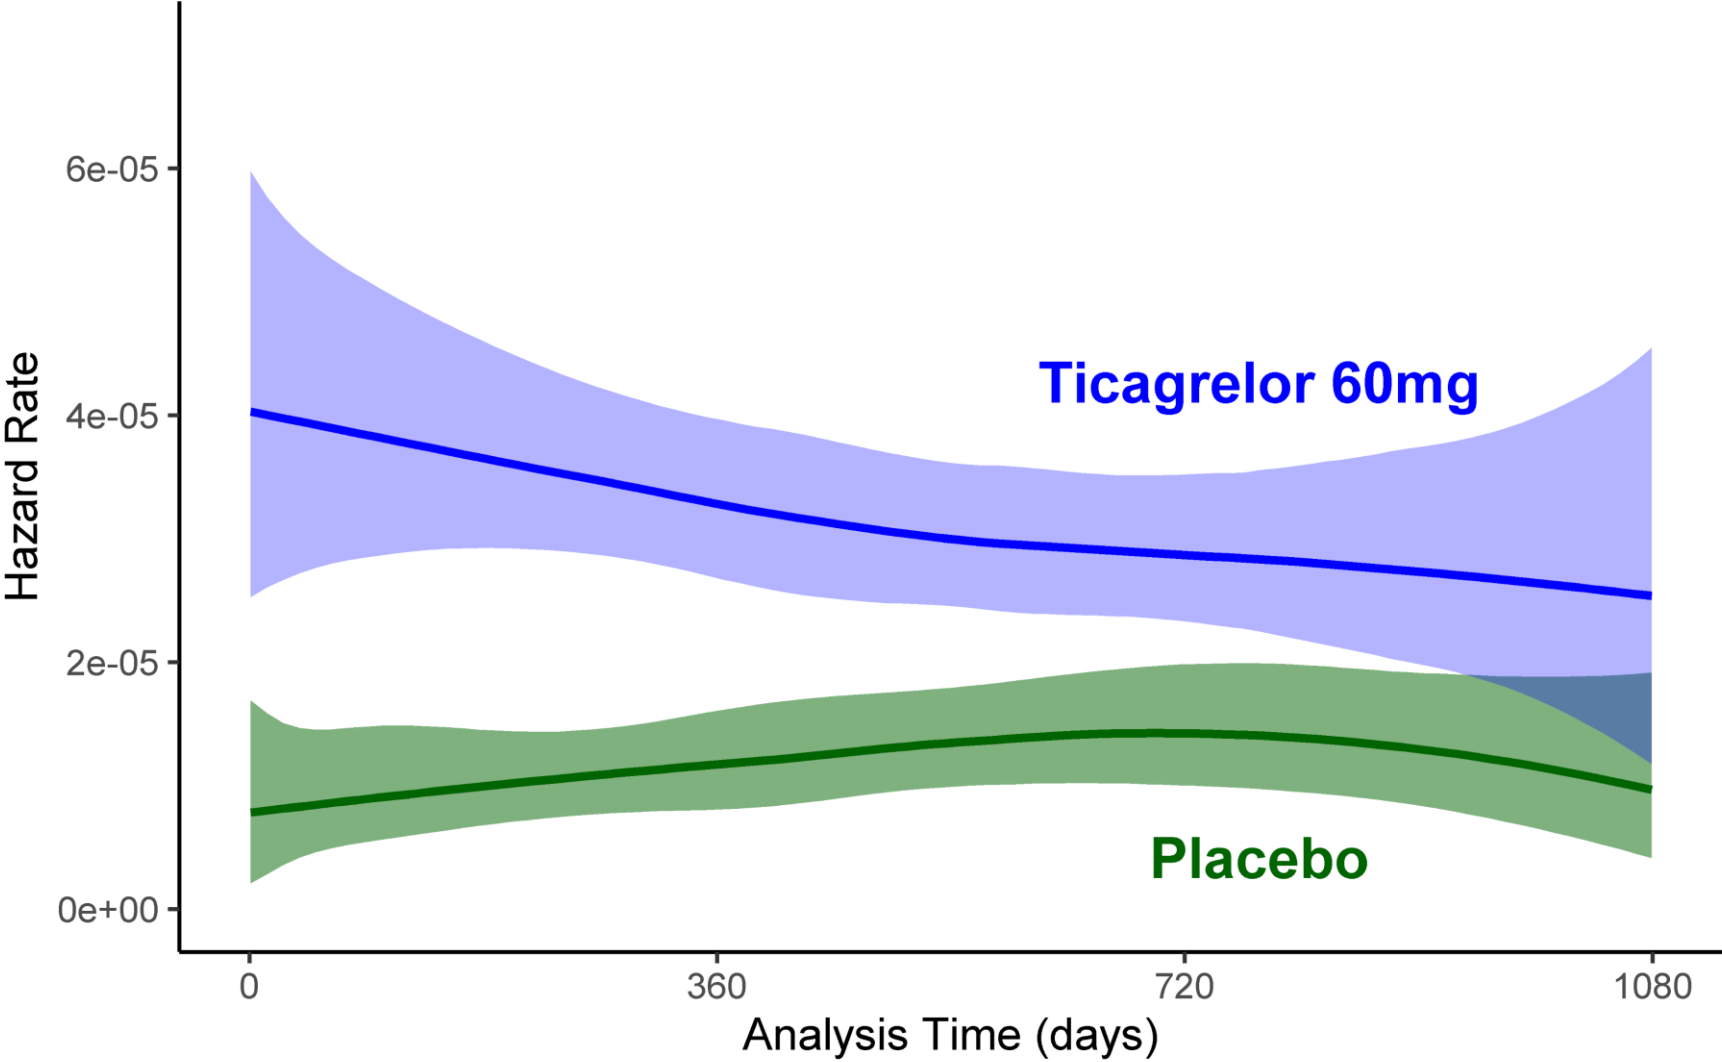

Figure S5. Sites (a) and etiologies (b) of TIMI major or minor bleeding, Ticagrelor 90 mg vs. placebo. HR=Hazard Ratio, CI=Confidence Interval, TIMI=Thrombolysis in Myocardial Infarction, ARI=Absolute risk Increase, KM=Kaplan Maier.

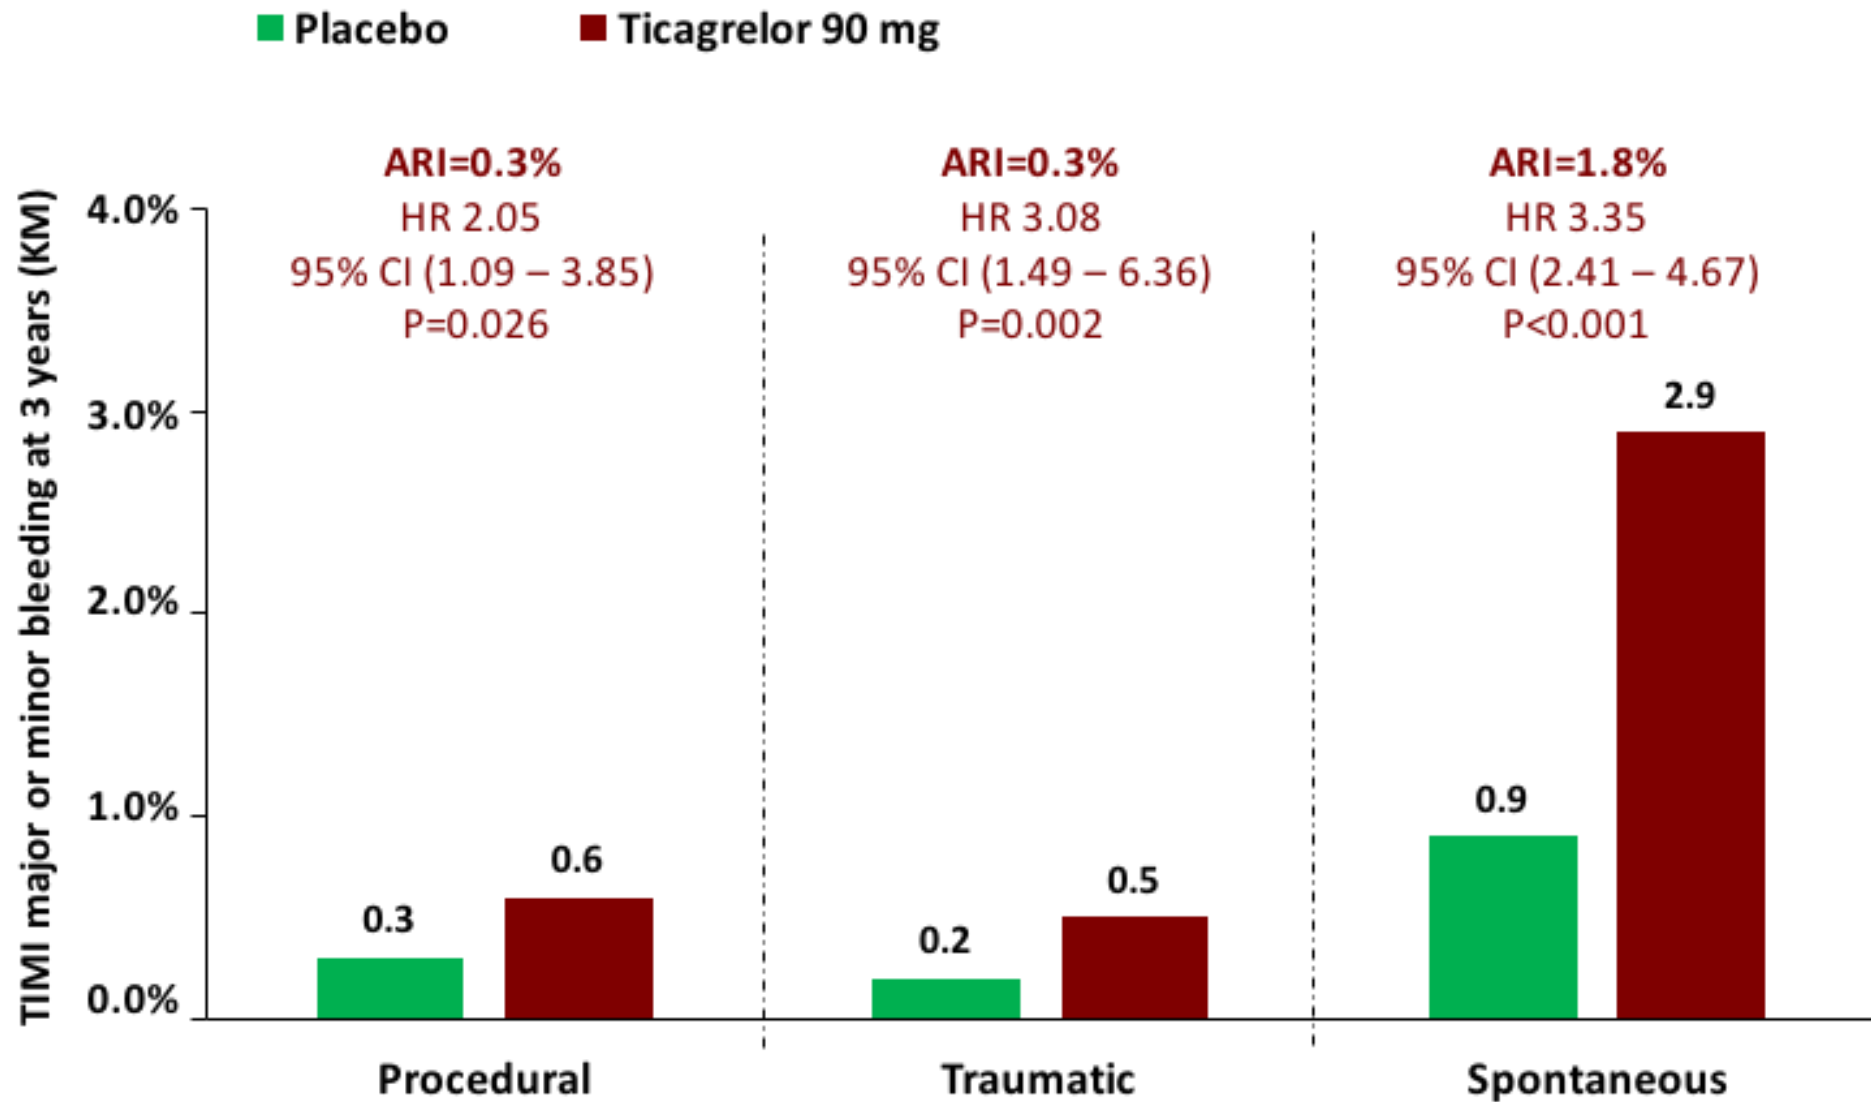

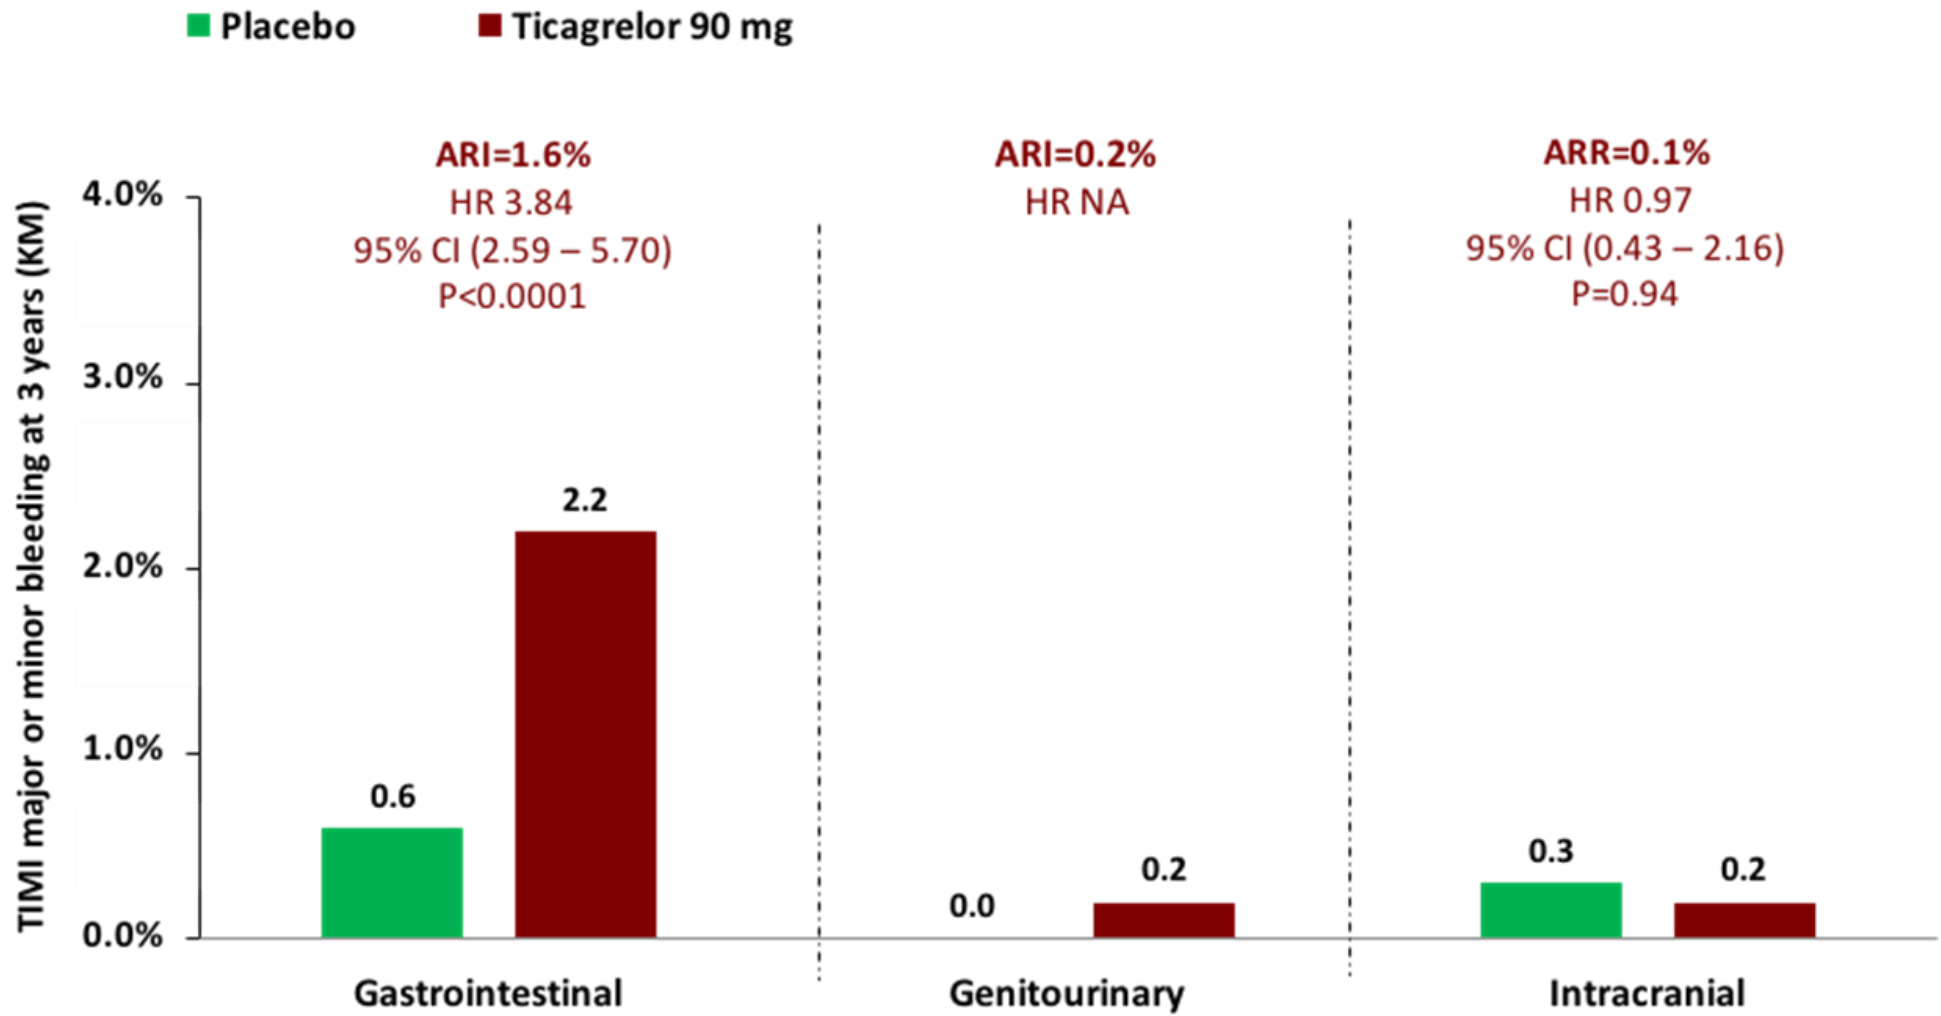

Figure S6. Bleeding and death, Ticagrelor 90 mg vs. placebo. HR=Hazard Ratio, CI=Confidence Interval, TIMI=Thrombolysis in Myocardial Infarction, KM=Kaplan Maier.

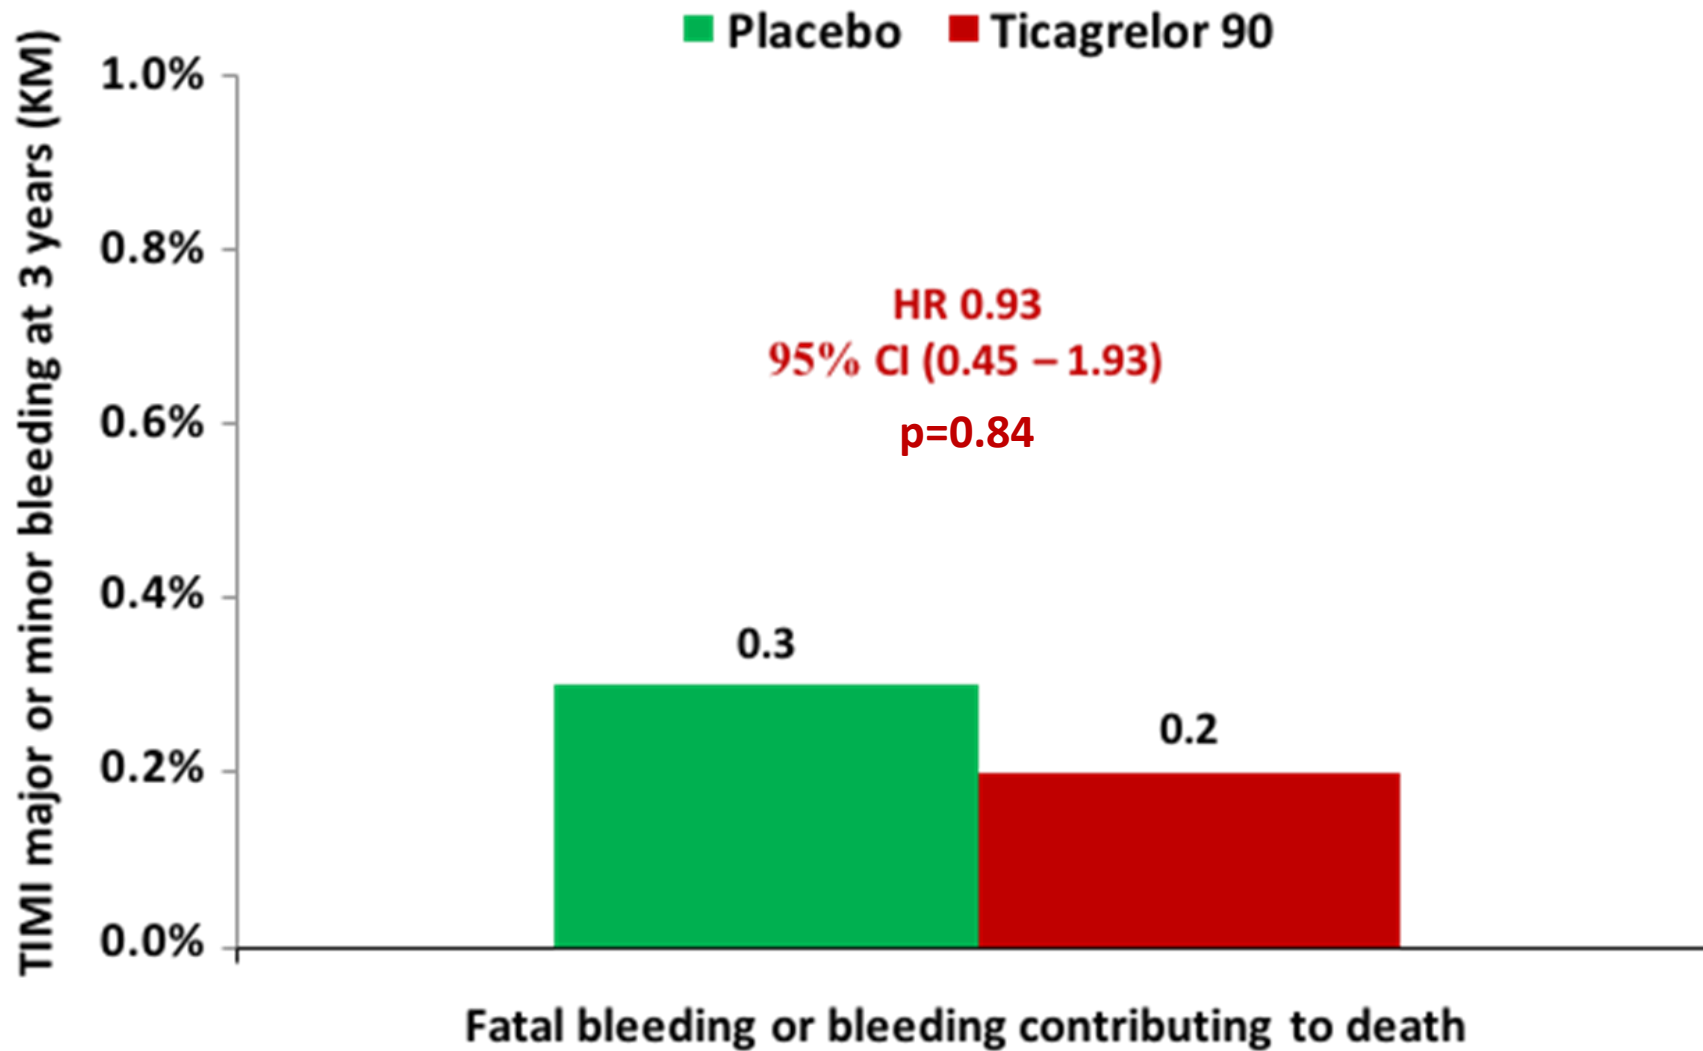

Supplement: JAH3-10-e017008-s001.pdf [file JAH3-10-e017008-s001.pdf]
